# Supplementary material for: Single-cell atlas of AML reveals age-related gene regulatory networks in t(8;21) AML
Source: eLife. 2026 Feb 11;14:RP104978. doi: 10.7554/eLife.104978 (PMC12893711; doi:10.7554/eLife.104978)
Supplement: Figure 1—source data 1. [file elife-104978-fig1-data1.xlsx]

## Sheet: Figure 1 - Source Data 1
Method	Silhouette label	cLISI	Silhouette batch	iLISI	KBET	Graph connectivity	PCR comparison	Batch correction	Bio conservation	Total
scVI (Sample) - 2000 Genes	0.854601	0.685717	1	0.244153	0.668096	0.969998	0.532403	0.898125	0.760459	1
scVI (Sample) - 4000 Genes	0.835467	0.704231	0.852408	0.219296	0.541997	1	0.539944	0.869044	0.758822	0.9641
scVI (Sample) - 10000 Genes	0.69508	0.701183	0.723233	0.216716	0.579596	0.95067	0.560963	0.862164	0.677485	0.924129
scVI (Sample) - 6000 Genes	0.697562	0.722708	0.76725	0.211152	0.441385	0.98426	0.559161	0.843444	0.68964	0.906156
scVI (Sample) - 8000 Genes	0.728012	0.720031	0.75548	0.210322	0.264097	0.99386	0.574075	0.813085	0.705617	0.875558
Harmony - 6000 Genes	0.132895	0.139758	0.433227	0.945529	0.860175	0.18947	1	1	0.0776229	0.857995
Harmony - 6000 Genes	0.0829509	0.151678	0.42706	0.936651	0.81664	0.190959	0.990599	0.978022	0.0551774	0.822617
Harmony - 10000 Genes	0.0749084	0.151181	0.410283	0.941046	0.82071	0.204233	0.985266	0.978604	0.0503569	0.821448
Harmony - 2000 Genes	0.20141	0	0.686203	1	1	0	0.991261	0.963974	0.0468151	0.802331
Harmony - 4000 Genes	0.134323	0.0718465	0.564026	0.977132	0.75411	0.092815	0.995109	0.932194	0.0445361	0.76291
Harmony - All Genes	0.134323	0.0718465	0.564026	0.977132	0.753882	0.092815	0.995109	0.932131	0.0445361	0.762833
scANVI (Sample) - 8000 Genes	0.41162	0.375302	0.466412	0.490154	0.617133	0.88274	0.572879	0.830493	0.353662	0.759801
scANVI (Sample) - 6000 Genes	0.363649	0.349737	0.431795	0.518851	0.647163	0.859965	0.567297	0.818671	0.313627	0.729898
scVI (Sample) - All Genes	0.62522	0.70825	0.684849	0.218134	0.266653	0.995551	0.482424	0.712562	0.641295	0.728655
scANVI (Sample) - 10000 Genes	0.248252	0.358706	0.473915	0.510821	0.583746	0.849093	0.537349	0.769079	0.252497	0.645993
scANVI (Sample) - 4000 Genes	0.267724	0.285161	0.316918	0.592977	0.704208	0.818845	0.534458	0.769526	0.226857	0.636564
scANVI (Sample) - All Genes	0.274811	0.406165	0.506174	0.478945	0.432516	0.871699	0.507118	0.709845	0.291286	0.589252
scVI (Study) - 2000 Genes	0.935867	0.905485	0.645991	0.0322079	0.31644	0.984786	0.248751	0.470271	0.91636	0.541828
scANVI (Sample) - 2000 Genes	0	0.135618	0.00556369	0.748903	0.859812	0.772925	0.478143	0.701946	0	0.466402
scVI (Study) - 4000 Genes	0.8686	0.960591	0.393823	0.00515504	0.175481	0.968417	0.241729	0.387217	0.905623	0.436945
scVI (Study) - 6000 Genes	0.814336	0.965959	0.27006	0.00366581	0.126862	0.952893	0.266009	0.377352	0.877451	0.414028
scANVI (Study) - 4000 Genes	0.691762	0.910219	0.2583	0.0327791	0.353471	0.953639	0.233853	0.407055	0.77994	0.412125
scVI (Study) - 8000 Genes	0.714953	0.967103	0.246152	0.00365967	0.258008	0.928122	0.258653	0.391135	0.821519	0.40899
scVI (Study) - 10000 Genes	0.750721	0.969057	0.15302	0.00319839	0.207937	0.961254	0.228277	0.3523	0.84283	0.370187
scANVI (Study) - 8000 Genes	0.561939	0.938289	0.164984	0.0146684	0.204606	0.949779	0.252612	0.372361	0.720142	0.346803
scANVI (Study) - 6000 Genes	0.555626	0.938681	0.0931588	0.0145038	0.194813	0.969827	0.246331	0.36535	0.716748	0.336982
scANVI (Study) - 2000 Genes	0.372299	0.792863	0.202719	0.122343	0.653455	0.995981	0.15033	0.421973	0.539734	0.336805
scANVI (Study) - 10000 Genes	0.603994	0.942569	0.0865482	0.0137109	0.180006	0.969024	0.233617	0.346967	0.746188	0.32614
Uncorrected - 2000 Genes	0.850926	0.987245	0.787646	0.0206995	0.505172	0.817086	0	0.197022	0.908879	0.207589
scANVI (Study) - All Genes	0.568709	0.949687	0	0.00757196	0.188668	0.971166	0.137656	0.241774	0.72968	0.192168
Uncorrected - 4000 Genes	0.997097	1	0.65535	0.00212287	0.247523	0.842593	0	0.123214	0.998349	0.152884
scVI (Study) - All Genes	0.647324	0.971107	0.0792219	0.00236727	0	0.943616	0.143156	0.189732	0.785068	0.150603
Uncorrected - All Genes	0.997097	1	0.65535	0.00212249	0.247373	0.826836	0	0.115258	0.99835	0.143238
Uncorrected - 6000 Genes	0.994189	1	0.534825	0.000307274	0.23393	0.720071	0	0.0446347	0.996696	0.05696
Uncorrected - 8000 Genes	1	1	0.502551	0	0.160596	0.755991	0	0.0387548	1	0.0511149
Uncorrected - 10000 Genes	0.981353	1	0.499992	3.36562e-06	0.110207	0.70726	0	0	0.989399	0
