# Supplementary material for: Single-cell atlas of AML reveals age-related gene regulatory networks in t(8;21) AML
Source: eLife. 2026 Feb 11;14:RP104978. doi: 10.7554/eLife.104978 (PMC12893711; doi:10.7554/eLife.104978)
Supplement: Source data 1. [file elife-104978-data1.xlsx]

## Sheet: Source Data 1
Study	DOI	Protocol	Samples Included	Data Source
Zheng et al, 2017	https://doi.org/10.1038/ncomms14049	10X Genomics	2 AML	http://support.10xgenomics.com/single-cell/datasets
Oetjen et al, 2018	https://doi.org/10.1172/jci.insight.124928	10X Genomics	25 Healthy BM (20 donors)	GSE120221
Van Galen et al, 2019	https://doi.org/10.1016/j.cell.2019.01.031	Seq-Well	16 AML 5 Healthy BM (4 donors)	GSE116256
Setty et al, 2019	https://doi.org/10.1038/s41587-019-0068-4	10X Genomics	3 Healthy BM	https://explore.data.humancellatlas.org/projects/091cf39b-01bc-42e5-9437-f419a66c8a45
Petti et al, 2019	https://doi.org/10.1038/s41467-019-11591-1	10X Genomics	5 AML	https://zenodo.org/records/3345981
Pei et al, 2020	https://doi.org/10.1158/2159-8290.cd-19-0710	10X Genomics (CITE-seq)	1 AML	GSE143363
Caron et al, 2020	https://doi.org/10.1038/s41598-020-64929-x	10X Genomics	3 Healthy BM	GSE132509
Jiang et al, 2020	https://doi.org/10.1073/pnas.2003900117	10X Genomics	9 AML	https://www.biosino.org/node/project/detail/OEP000629
Johnston et al, 2020	https://doi.org/10.1016/j.gene.2020.144758	10X Genomics	2 AML (1 donor)	GSE145410
Velten et al, 2021	https://doi.org/10.1038/s41467-021-21650-1	Muta-Seq	4 AML	https://doi.org/10.6084/m9.figshare.12382685.v1
Stetson et al, 2021	https://doi.org/10.1038/s41375-021-01338-7	Smart-Seq2	4 AML	GSE126068
Zhai et al, 2022	https://doi.org/10.1186/s12943-022-01635-4	SORT-Seq	6 AML	Provided by authors upon request
Human Cell Atlas, 2022	NA	10X Genomics	16 Healthy BM (8 donors)	https://explore.data.humancellatlas.org/projects/cc95ff89-2e68-4a08-a234-480eca21ce79
Lasry et al, 2023	https://doi.org/10.1038/s43018-022-00480-0	10X Genomics	42 AML 5 Healthy BM	GSE185381
Li et al, 2023	https://doi.org/10.1038/s41375-022-01789-6	10X Genomics	4 AML	OMIX002180
Naldini et al, 2023	https://doi.org/10.1038/s41467-023-36969-0	10X Genomics	16 AML	GSE185993
Beneyto-Calabuig et al, 2023	https://doi.org/10.1016/j.stem.2023.04.001	10X Genomics	19 AML 1 Healthy BM	https://doi.org/10.6084/m9.figshare.20291628
Zhang et al, 2023	https://doi.org/10.1186/s13059-023-03031-7	10X Genomics	13 AML 1 Healthy BM	Provided by authors upon request
Mumme et al, 2023	https://doi.org/10.1038/s41467-023-41994-0	10X Genomics	19 AML	GSE235923
Fiskus et al, 2023	https://doi.org/10.1038/s41408-023-00826-6	10X Genomics	1 AML	GSE228326
